# Supplementary material for: Effects of thermosensitive poly(N-isopropylacrylamide) on blood coagulation
Source: Royal Society of Chemistry journal article supplement (doi:10.1039/c6tb00823b), 2016-01-01
Supplement: c6tb00823b1.pdf [file c6tb00823b1.pdf]

## **Effect of thermosensitive poly(N-isopropylacrylamide) on blood coagulation**

Yi Zhang, Jianzhou Cai, Chenghua Li, Jianye Wei, Zonghua Liu \*, Wei Xue \*

Key Laboratory of Biomaterials of Guangdong Higher Education Institutes, Department of Biomedical Engineering, Jinan University,

Guangzhou, 510632, China

\* Corresponding authors: Zonghua Liu (tliuzonghua@jnu.edu.cn)

Wei Xue (weixue\_jnu@aliyun.com)

Tel and Fax: 86-20-85226397

## 1 Zeta potential and size of PNIPAM aggregates in water

The zeta potential and size of PNIPAM aggregates in water were measured with a zeta potential analyzer (Zetasizer Nano ZS, Malvern Instruments Ltd., UK). The data were listed in Table S1.

Table S1 Zeta potential and size of PNIPAM aggregates in water (n=3).

| Temperature | Zeta potential (mV) | Size (nm) |
|-------------|---------------------|-----------|
| 25°C        | -0.4203             | 39.17     |
| 32°C        | -0.1048             | 191.23    |
| 37°C        | -0.6953             | 657.1     |

## 2 Hemolysis of PNIPAM

### 2.1 Method

RBC suspension (50  $\mu$ L, 16% v/v in PBS) was incubated with PBS or PNIPAM solutions (1 mL) at room temperature or 37°C, respectively. After incubation for predetermined time, the RBC suspension was centrifuged at 1000 $\times$ g for 5 min. The resulting supernatants were collected, 200  $\mu$ L of which were measured at 540 nm with a 96-well plate reader (Multiskan MK3, Thermo Scientific) to detect hemoglobin release from

the RBCs. Complete (100%) hemolysis was prepared by adding the RBC suspension (50  $\mu$ L, 16% v/v in PBS) to 1 mL of pure water. The hemolysis rate of PNIPAM-treated RBCs was calculated by comparing their A540nm values to that of the 100% hemolysis sample.

## 2.2 Result

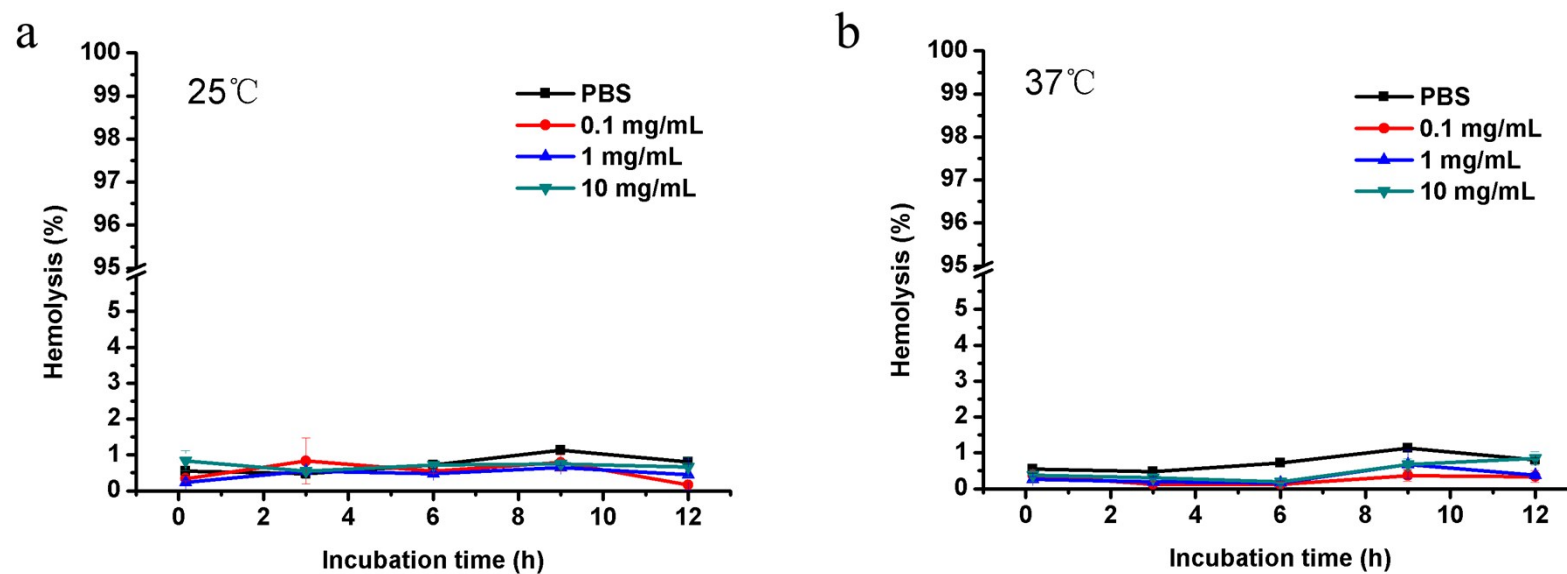

Figure 1S Hemolysis of PNIPAM at 25 or 37°C (n=5).

### **3 Adsorption of AA to PNIPAM at 25 or 37°C**

#### **3.1 Method**

For convenient isolation of PNIPAM, PNIPAM immobilized magnetic beads were introduced into experiment of AA adsorption. Preparation of beads coated with PNIPAM was same as procedures in plasma protein absorption study. The AA adsorption measurement was performed as followed. Firstly, 200  $\mu\text{L}$  aliquots of magnetic beads suspension(10 mg/mL) were mixed with 500  $\mu\text{L}$  AA aqueous solution and incubated at 37°C and 25°C respectively by shaking 2 h. Secondly, Prior to removing the supernatants, magnetic beads were collected and washed with 37°C and 25°C PBS twice respectively. Subsequently, adsorbed AA were eluted from beads surface by shaking 1 h with elution buffer (200 $\mu\text{L}$  PBS, containing 0.1% Tween-20) at room temperature and the eluted samples were centrifuged after removing the magnetic beads. Finally supernatants were collected and diluted with 10-fold, subjected to UV spectra scanning with a UV-2550 spectrophotometer (Shimadzu Corporation, Japan) from 200 nm to 500 nm.

#### **3.2 Result**

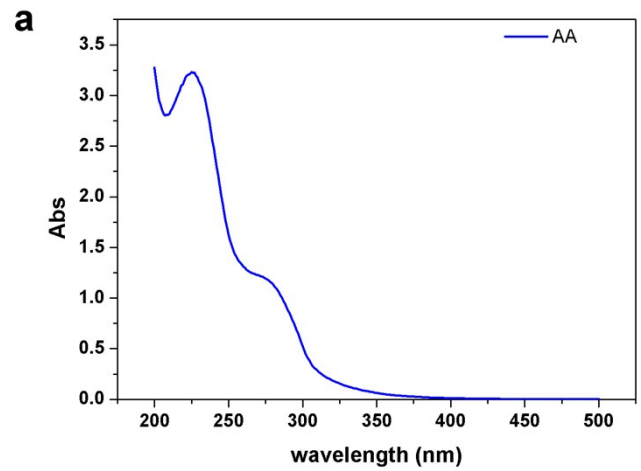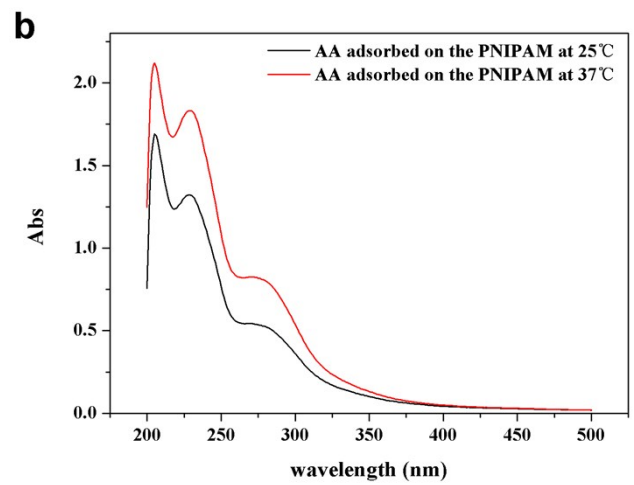

Figure 2S (a) UV spectrum of AA (not adsorbed on PNIPAM); (b) UV absorption spectra of AA adsorbed on the PNIPAM immobilized magnetic beads at 25 or 37°C.

#### 4 Proteomics analysis of the adsorbed plasma proteins onto the PNIPAM-coated beads

Table S2: Identification of the plasma proteins adsorbed at different temperatures.

| NO | Protein Types                      | Accession | Gene name | Proteins on PNIPAM at 37°C      | Proteins on PNIPAM at 25°C |
|----|------------------------------------|-----------|-----------|---------------------------------|----------------------------|
| 1  | Immune response related proteins   | P00751    | CFB       | Complement factor B             |                            |
| 2  |                                    | P00738    | HP        | Haptoglobin                     |                            |
| 3  |                                    | P01024    | C3        | Complement C3                   |                            |
| 4  |                                    | P01859    | IGHG2     | Ig gamma-2 chain C region       |                            |
| 5  |                                    | P01857    | IGHG1     | Ig gamma-1 chain C region       |                            |
| 6  |                                    | P01871    | IGHM      | Ig mu chain C region            | Ig mu chain C region       |
| 7  |                                    | P01861    | IGHG4     | Ig gamma-4 chain C region       |                            |
| 8  |                                    | P81605    | DCD       | Dermeidin                       | Dermeidin                  |
| 9  | Blood coagulation related proteins | P02671    | FGA       | Fibrinogen alpha chain          | Fibrinogen alpha chain     |
| 10 |                                    | P03951    | F11       | Coagulation factor XI           |                            |
| 11 |                                    | P05106    | ITGB3     | Integrin beta-3                 |                            |
| 12 |                                    | P00488    | F13A1     | Coagulation factor XIII A chain |                            |
| 13 | Transport/Binding proteins         | P02768    | ALB       | Serum albumin                   | Serum albumin              |
| 14 |                                    | P02647    | APOA1     | Apolipoprotein A-I              | Apolipoprotein A-I         |
| 15 |                                    | P02649    | APOE      | Apolipoprotein E                | Apolipoprotein E           |

|    |                       |        |         |                                   |                                                         |
|----|-----------------------|--------|---------|-----------------------------------|---------------------------------------------------------|
| 16 |                       | P04004 | VTN     | Vitronectin                       | Vitronectin                                             |
| 17 |                       | P02787 | TF      | Serotransferrin                   |                                                         |
| 18 |                       | P02788 | LTF     | Lactotransferrin                  |                                                         |
| 19 |                       | P14923 | JUP     |                                   | Junction plakoglobin                                    |
| 20 |                       | Q08554 | DSC1    |                                   | Desmocollin-1                                           |
| 21 |                       | Q02413 | DSG1    |                                   | Desmoglein-1                                            |
| 22 |                       | Q5SW24 | DACT2   |                                   | Dapper homolog 2                                        |
| 23 |                       | Q8TER0 | SNED1   |                                   | Sushi, nidogen and EGF-like domain-containing protein 1 |
| 24 |                       | Q9BT23 | LIMD2   |                                   | LIM domain-containing protein 2                         |
| 25 |                       | Q9UK10 | ZNF221  |                                   | Zinc finger protein 225                                 |
| 26 |                       | Q9H6R4 | NOL6    |                                   | Nucleolar protein 6                                     |
| 27 |                       | Q9UPQ0 | LIMCH1  |                                   | LIM and calponin homology domains-containing protein 1  |
| 28 | Cytoskeletal proteins | P60709 | ACTB    | Actin, cytoplasmic 1              |                                                         |
| 29 |                       | P46821 | MAP1B   | Microtubule-associated protein 1B |                                                         |
| 30 |                       | P35321 | SPRR1A  | Cornifin-A                        | Cornifin-A                                              |
| 31 |                       | Q8TD57 | DNAH3   | Dynein heavy chain 3, axonemal    | Dynein heavy chain 3, axonemal                          |
| 32 |                       | Q86YZ3 | HRNR    | Hornerin                          | Hornerin                                                |
| 33 |                       | Q5T749 | KPRP    | Keratinocyte proline-rich protein |                                                         |
| 34 |                       | P22528 | SPRR1B  |                                   | Cornifin-B                                              |
| 35 |                       | Q08AD1 | CAMSAP2 |                                   | Calmodulin-regulated spectrin-associated protein 2      |

---

|    |                |        |          |                               |                                 |
|----|----------------|--------|----------|-------------------------------|---------------------------------|
| 36 |                | Q70YC5 | ZNF365   |                               | Protein ZNF365                  |
| 37 |                | Q9BYE4 | SPRR2G   |                               | Small proline-rich protein 2G   |
| 38 | Other proteins | Q8TCG1 | KIAA1524 | Protein CIP2A                 |                                 |
| 39 |                | Q14410 | GK2      | Glycerol kinase 2             |                                 |
| 40 |                | P0C869 | PLA2G4B  |                               | Cytosolic phospholipase A2 beta |
| 41 |                | Q6UWP8 | SBSN     |                               | Suprabasin                      |
| 42 |                | Q6IPM2 | IQCE     |                               | IQ domain-containing protein E  |
| 43 |                | Q9GZM5 | YIPF3    |                               | Protein YIPF3                   |
| 44 |                | Q16629 | SRSF7    | Serine/arginine-rich factor 7 | splicing                        |
| 45 |                | O60882 | MMP20    | Matrix metalloproteinase-20   |                                 |

---



### 5 Morphology of PNIPAM aggregates above LCST

The morphology of PNIPAM aggregates in water at different temperatures was observed by TEM (FEI Tecnai Osiris, FEI Instruments Ltd., USA).

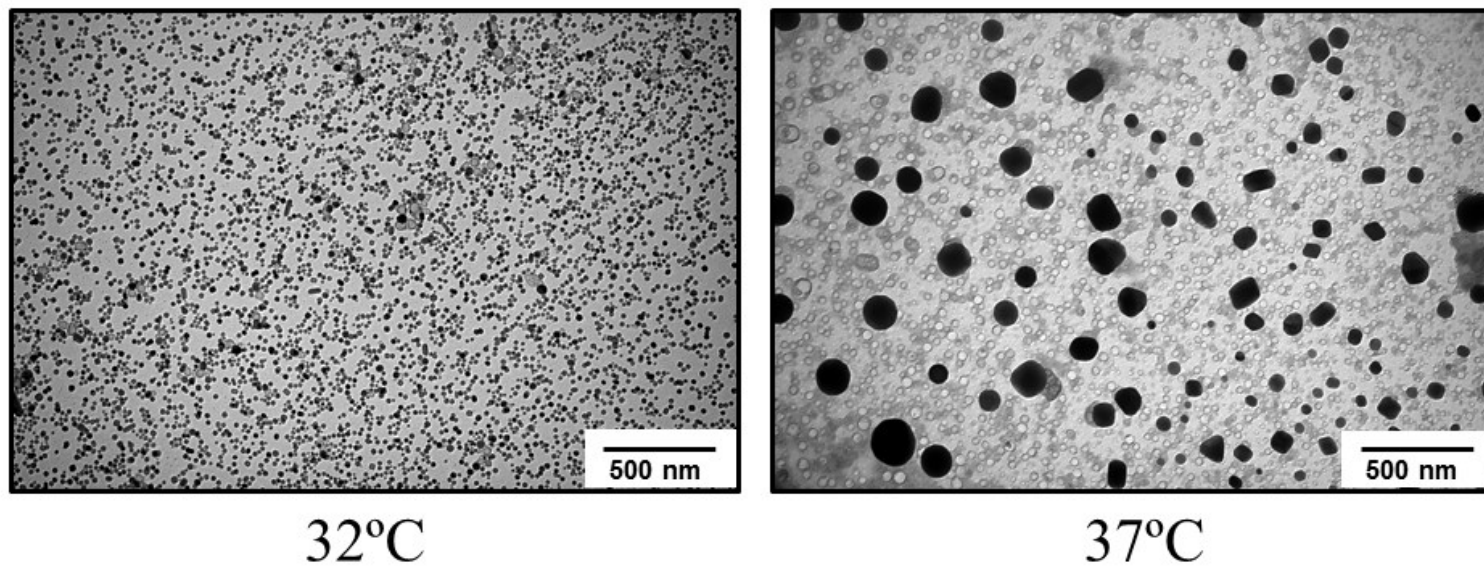

Figure 3S Morphology of PNIPAM aggregates in water.

## 6 Effect of PNIPAM on secondary structure of fibrinogen detected by circular dichroism

Table S3: Quantification of secondary structure of fibrinogen in the presence of PNIPAM

| <i>Samples</i>                   | <i><math>\alpha</math> helix</i> | <i><math>\beta</math> sheet</i> | <i><math>\beta</math> turn</i> | <i>Random coil</i> |
|----------------------------------|----------------------------------|---------------------------------|--------------------------------|--------------------|
| Fibrinogen                       | 30.40%                           | 20.50%                          | 19.50%                         | 29.60%             |
| Fibrinogen - PNIPAM (0.01 mg/ml) | 26.10%                           | 21.60%                          | 18.70%                         | 33.60%             |
| Fibrinogen - PNIPAM (0.05 mg/ml) | 25.90%                           | 21.80%                          | 18.80%                         | 33.50%             |
| Fibrinogen - PNIPAM (0.1 mg/ml)  | 24.70%                           | 22.10%                          | 18.60%                         | 34.60%             |
| Fibrinogen - PNIPAM (0.15 mg/ml) | 24.70%                           | 21.40%                          | 17.80%                         | 36.10%             |
| Fibrinogen - PNIPAM (0.2 mg/ml)  | 24.70%                           | 21.40%                          | 17.80%                         | 36.10%             |
| Fibrinogen - PNIPAM (0.4 mg/ml)  | 24.00%                           | 21.70%                          | 17.70%                         | 36.60%             |
| Fibrinogen - PNIPAM (0.6 mg/ml)  | 24.60%                           | 21.40%                          | 17.80%                         | 36.20%             |
| Fibrinogen - PNIPAM (0.8 mg/ml)  | 23.10%                           | 22.10%                          | 17.80%                         | 37.00%             |
| Fibrinogen - PNIPAM (1 mg/ml)    | 23.20%                           | 22.20%                          | 17.90%                         | 36.70%             |
| Fibrinogen - PNIPAM (2 mg/ml)    | 22.10%                           | 23.10%                          | 18.30%                         | 36.50%             |
